# Supplementary material for: Genome-centric analyses of 165 metagenomes show that mobile genetic elements are crucial for the transmission of antimicrobial resistance genes to pathogens in activated sludge and wastewater
Source: PubMed Central journal article supplement (PMC10913551; doi:10.1128/spectrum.02918-23), 2024-01-30
Supplement: spectrum.02918-23-s0004.pdf [file spectrum.02918-23-s0004.pdf]

**Table S2.** Summary of the sequence reads characteristics including the number of reads and base pairs of metagenomes retrieved from activated sludge and wastewater.

|       | Activated sludge    |                       |                             | Wastewater          |                       |                             |
|-------|---------------------|-----------------------|-----------------------------|---------------------|-----------------------|-----------------------------|
|       | Reads<br>count (bp) | Base pairs<br>(bp)    | Library<br>fragment<br>(bp) | Reads<br>count (bp) | Base pairs<br>(bp)    | Library<br>fragment<br>(bp) |
| Max   | $8.68 \times 10^7$  | $2.60 \times 10^{10}$ | 602                         | $8.27 \times 10^7$  | $2.48 \times 10^{10}$ | 302                         |
| Min   | $1.82 \times 10^6$  | $6.91 \times 10^8$    | 150                         | $3.79 \times 10^6$  | $8.79 \times 10^8$    | 153                         |
| Ave   | $3.12 \times 10^7$  | $8.98 \times 10^9$    | 289.96                      | $1.62 \times 10^7$  | $4.32 \times 10^9$    | 254.07                      |
| SD    | $1.80 \times 10^7$  | $5.48 \times 10^7$    | 69.69                       | $1.72 \times 10^7$  | $5.29 \times 10^9$    | 52.63                       |
| Total | $4.3 \times 10^9$   | $1.24 \times 10^{12}$ | 40014                       | $4.36 \times 10^8$  | $1.17 \times 10^{11}$ | 6860                        |
